# Supplementary material for: Tackling the Taxonomic Challenges in the Family Scoliidae (Insecta, Hymenoptera) Using an Integrative Approach: A Case Study from Southern China
Source: MDPI journal article supplement (doi:10.3390/insects12100892), 2021-10-01
Supplement: s1 [file s1]

## Supplement

Table S1 Details of sequenced specimens

| Code        | Species                               | Collecting data                                                                                                       |
|-------------|---------------------------------------|-----------------------------------------------------------------------------------------------------------------------|
| SCAU3043675 | <i>Austroscolia ruficeps</i>          | Hainan, Mt. Diaoluoshan, 18°39'55.6"N109°58'16.04"E, 30.vi-31.vii.2020, Malaise trap, Longlong Chen                   |
| SCAU3043670 | <i>Carinoscolia vittifrons</i>        | Guangdong, Mt. Dinghushan, 23°9'48.02"N112°32'52.03"E, 29.iv-31.v.2020, Malaise trap, Longlong Chen                   |
| SCAU3043671 | <i>Carinoscolia vittifrons</i>        | Guangdong, Mt. Dinghushan, 23°9'48.02"N112°32'52.03"E, 29.iv-31.v.2020, Malaise trap, Longlong Chen                   |
| SCAU3043672 | <i>Carinoscolia vittifrons</i>        | Guangdong, Mt. Dinghushan, 23°9'48.02"N112°32'52.03"E, 29.iv-31.v.2020, Malaise trap, Longlong Chen                   |
| SCAU3043673 | <i>Carinoscolia vittifrons</i>        | Guangdong, South China Botanical Garden, 23°11'25.82"N113°21'47.01"E, 1-30.vi.2020, Malaise trap, Jianwei Li          |
| En-418584   | <i>Carinoscolia vittifrons</i>        | Guangdong, Mt. Dinghushan, 23°9'27.93"N112°32'45.46"E, 18.ix-23.x.202, Malaise trap                                   |
| SCAU3043661 | <i>Liacos erythrosoma</i>             | Guangdong, Shenzhen, 22°31'59.58"N113°58'7.58"E, 29.iv-5.vi.2020, Malaise trap, Longlong Chen                         |
| SCAU3043662 | <i>Liacos erythrosoma</i>             | Guangdong, Shenzhen, 22°31'59.58"N113°58'7.58"E, 29.iv-5.vi.2020, Malaise trap, Longlong Chen                         |
| SCAU3048016 | <i>Liacos erythrosoma</i>             | Hainan, Nankai Town, areca-nut plantation, 19°4'44.68"N109°24'4.74"E, 31.i-29.ii.2020, Malaise trap, Longlong Chen    |
| SCAU3043656 | <i>Megacampsomeris asiatica</i>       | Yunnan, Mt. Gaoligongshan, 26°0'52.55"N98°38'7.23"E, 2022m, 1-15.ix.2020, Malaise trap, Lang Yi                       |
| SCAU3043660 | <i>Megacampsomeris binghami</i>       | Yunnan, Mt. Gaoligongshan, 27°41'6.73"N98°16'25.64"E, 1181m, 20.iv-15.v.2020, Lang Yi                                 |
| SCAU3048011 | <i>Megacampsomeris binghami</i>       | Guangdong, Mt. Yunkaishan, 22°16'22.67"N111°11'38.7"E, 2-27.xi.2020, Malaise trap, Longlong Chen                      |
| SCAU3043653 | <i>Megacampsomeris farrenwhitei</i>   | Guangdong, South China Botanical Garden, 23°10'56.16"N113°21'28.94"E, 1-30.vi.2020, Malaise trap, Jianwei Li          |
| SCAU3043654 | <i>Megacampsomeris farrenwhitei</i>   | Guangdong, South China Botanical Garden, 23°10'56.16"N113°21'28.94"E, 1-30.vi.2020, Malaise trap, Jianwei Li          |
| SCAU3043658 | <i>Megacampsomeris farrenwhitei</i>   | Guangdong, Mt. Gutianshan, 23°6'51.42"N114°47'36.35"E, 30.x-30.xi.2019, Malaise trap, Longlong Chen                   |
| SCAU3043659 | <i>Megacampsomeris farrenwhitei</i>   | Guangdong, South China Botanical Garden, 23°10'49.87"N113°21'21.33"E, 1.viii-1.ix.2020, Malaise trap, Wei Lin         |
| SCAU3043686 | <i>Megacampsomeris farrenwhitei</i>   | Guangdong, South China Botanical Garden, 23°10'56.83"N113°21'39.38"E, 2.xi-7.xii.2020, Malaise trap, Jianwei Li       |
| SCAU3048009 | <i>Megacampsomeris farrenwhitei</i>   | Hainan, Mt. Bawangling, 19°7'16.59"N109°5'12.24"E, 30.vii-30.viii.2020, Malaise trap, Longlong Chen                   |
| SCAU3048012 | <i>Megacampsomeris farrenwhitei</i>   | Hainan, Mt. Limushan, 19°10'22.14"N109°43'10.34"E, 31.vii-1.ix.2020, Malaise trap, Longlong Chen                      |
| SCAU3043657 | <i>Megacampsomeris prismatica</i>     | Guangdong, Mt. Gutianshan, 23°6'51.42"N114°47'36.35"E, 30.x-30.xi.2019, Malaise trap, Longlong Chen                   |
| SCAU3048015 | <i>Megacampsomeris prismatica</i>     | Hainan, Mt. Jianfengling, 18°41'35.57"N108°46'59.25"E, 30.xii.2019-30.i.2020, Malaise trap, Chunyang Xu               |
| NZ4760      | <i>Megacampsomeris pulchrivestita</i> | Guangdong, Mt. Gutianshan, 23°6'51.42"N114°47'36.35"E, 22.ix.2019, sweep net, Longlong Chen                           |
| SCAU3043655 | <i>Megacampsomeris shillongensis</i>  | Yunnan, Mt. Gaoligongshan, 25°25'59.6"N98°41'32.4"E, 1739m, 16-30.xi.2019, Malaise trap, Lang Yi                      |
| SCAU3043665 | <i>Megascolia (Regiscolia) azurea</i> | Hainan, Nankai Town, edge of forest, 19°4'20.77"N109°22'28.2"E, 31.i-29.ii.2020, Malaise trap, Longlong Chen          |
| SCAU3043666 | <i>Megascolia (Regiscolia) azurea</i> | Guangdong, Shenzhen, Xianhu Botanical Garden, 22°34'49.38"N114°10'22.01"E, 3-31.iii.2020, Malaise trap, Longlong Chen |
| SCAU3043667 | <i>Micromeriella marginella</i>       | Hainan, Wenchang, 19°32'56.61"N110°47'28.82"E, 10-20.ix.2019, Malaise trap, Chunyang Xu                               |
| SCAU3043668 | <i>Micromeriella marginella</i>       | Hainan, Wenchang, 19°32'56.61"N110°47'28.82"E, 10-20.ix.2019, Malaise trap, Chunyang Xu                               |
| SCAU3043685 | <i>Phalerimeris phalerata</i>         | Guangdong, South China Botanical Garden, 23°11'11.69"N113°21'49.52"E, 1.ix-9.x.2020, Malaise trap, Jianwei Li         |
| NZ4762      | <i>Phalerimeris phalerata</i>         | Guangdong, Dongguan Botanical Garden, 22°57'45.54"N113°44'29.18"E, 24.ix.2019, sweep net, Longlong Chen               |

|             |                                        |                                                                                                                      |
|-------------|----------------------------------------|----------------------------------------------------------------------------------------------------------------------|
| NZ4792      | <i>Phalerimeris phalerata</i>          | Guangdong, Dalingshan Forest Park, 22°51'30.23"N113°45'16.58"E, 30.vii.2020, sweep net, Longlong Chen                |
| NZ4832      | <i>Phalerimeris phalerata</i>          | Guangdong, Mt. Gutianshan, 23°6'51.42"N114°47'36.35"E, 4.viii.2020, sweep net, Longlong Chen                         |
| NZ4835      | <i>Phalerimeris phalerata</i>          | Guangdong, Mt. Gutianshan, 23°6'51.42"N114°47'36.35"E, 4.viii.2020, sweep net, Longlong Chen                         |
| SCAU3043669 | <i>Phalerimeris phalerata</i>          | Guangdong, South China Botanical Garden, 23°11'11.69"N113°21'49.52"E, 30.vi-1.viii.2020, Malaise trap, Wei Lin       |
| SCAU3048017 | <i>Phalerimeris phalerata</i>          | Hainan, Danzhou, 19°30'50.46"N109°30'25.32"E, 30.iv-30.v.2020, sweep net, Longlong Chen                              |
| En-418587   | <i>Phalerimeris phalerata</i>          | Guangdong, Mt. Dinghushan, 23°9'27.93"N112°32'45.46"E, 18.ix-23.x.202, Malaise trap                                  |
| SCAU3043683 | <i>Scolia (Discolia) affinis</i>       | Guangdong, Mt. Xiangtoushan, 23°15'55.49"N114°26'50.46"E, 20-30.vii.2019, Malaise trap, Longlong Chen                |
| SCAU3043684 | <i>Scolia (Discolia) binotata</i>      | Guangdong, Shenzhen, Xianhua Botanical Garden, 22°34'49.38"N114°10'22.01"E, 5-29.vi.2020, Malaise trap, Jianwei Li   |
| SCAU3043682 | <i>Scolia (Discolia) clypeata</i>      | Guangdong, Shenzhen, 22°31'59.58"N113°58'7.58"E, 29.iv-5.vi.2020, Malaise trap, Longlong Chen                        |
| SCAU3043680 | <i>Scolia (Discolia) laeviceps</i>     | Hainan, Nankai Town, areca-nut plantation, 19°4'44.68"N109°24'4.74"E, 31.iii-30.iv.2020, Malaise trap, Longlong Chen |
| SCAU3043681 | <i>Scolia (Discolia) nobilis</i>       | Guangdong, Mt. Dinghushan, 23°9'48.02"N112°32'52.03"E, 29.iv-31.v.2020, Malaise trap, Longlong Chen                  |
| SCAU3048008 | <i>Scolia (Discolia) sikkimensis</i>   | Yunnan, Mt. Gaoligongshan, 25°18'22.99"N98°47'37.34"E, 1686m, 15—30.vi.2020, Malaise trap, Lang Yi                   |
| SCAU3043676 | <i>Scolia (Discolia) superciliaris</i> | Guangdong, South China Botanical Garden, 23°10'50.6"N113°21'35.01"E, 30.vi-1.viii.2020, Malaise trap, Wei Lin        |
| SCAU3043677 | <i>Scolia (Discolia) superciliaris</i> | Guangdong, South China Botanical Garden, 23°10'56.83"N113°21'39.38"E, 30.vi-1.viii.2020, Malaise trap, Wei Lin       |
| SCAU3043678 | <i>Scolia (Discolia) superciliaris</i> | Guangdong, South China Botanical Garden, 23°10'56.83"N113°21'39.38"E, 30.vi-1.viii.2020, Malaise trap, Wei Lin       |
| SCAU3048010 | <i>Scolia (Discolia) superciliaris</i> | Guangdong, Dongguan, Mt. Yinpingshan, 22°54'26.09"N114°13'13.47"E, 30.iv-31.v.2020, Malaise trap, Longlong Chen      |
| SCAU3048013 | <i>Scolia (Discolia) superciliaris</i> | Hainan, Mt. Diaoluoshan, 18°40'2.4"N109°54'32.09"E, 31.vii-2.ix.2020, Malaise trap, Longlong Chen                    |
| SCAU3043679 | <i>Scolia (Discolia) watanabei</i>     | Hainan, Mt. Jianfengling, 18°42'14.26"N108°47'21.23"E, 89m, 30.x-30.xi.2019, Malaise trap, Chunyang Xu               |
| En-418585   | <i>Scolia (Discolia) watanabei</i>     | Yunnan, Mt. Gaoligongshan, 25°18'22.99"N 98°47'37.34"E, 1686m, 15—30.vii.2020, Malaise trap, Lang Yi                 |
| SCAU3043674 | <i>Scolia</i> sp.                      | Hainan, Mt. Diaoluoshan, 18°40'2.4"N109°54'32.09"E, 30.vi-31.vii.2020, Malaise trap, Longlong Chen                   |
| SCAU3048014 | <i>Scolia</i> sp.                      | Hainan, Mt. Diaoluoshan, 18°40'2.4"N109°54'32.09"E, 31.vii-2.ix.2020, Malaise trap, Longlong Chen                    |
| SCAU3043664 | <i>Sericocampsomeris flavomacula</i>   | Hainan, Wenchang, 19°32'56.61"N110°47'28.82"E, 30.viii-10.ix.2019, Malaise trap, Chunyang Xu                         |
| En-418591   | <i>Sericocampsomeris flavomacula</i>   | Hainan, Wenchang, 19°32'56.61"N110°47'28.82"E, 30.viii-10.ix.2019, Malaise trap, Chunyang Xu                         |

Table S2 Genetic distance of *COI* within species under K2P model

| Species                                | Distance (%) |
|----------------------------------------|--------------|
| <i>Austroscolia ruficeps</i>           | NA           |
| <i>Carinoscolia vittifrons</i>         | 0-0.4        |
| <i>Liacos erythrosoma</i>              | 0.7-1        |
| <i>Megacampsomeris asiatica</i>        | NA           |
| <i>Megacampsomeris binghami</i>        | 1.9          |
| <i>Megacampsomeris farrenwhitei</i>    | 0-0.3        |
| <i>Megacampsomeris prismatica</i>      | 0.3          |
| <i>Megacampsomeris pulchrivestita</i>  | NA           |
| <i>Megacampsomeris shillongensis</i>   | NA           |
| <i>Megascolia (Regiscolia) azurea</i>  | 0.1          |
| <i>Micromeriella marginella</i>        | 0.1          |
| <i>Phalerimeris phalerata</i>          | 0-0.6        |
| <i>Scolia (Discolia) affinis</i>       | NA           |
| <i>Scolia (Discolia) binotata</i>      | NA           |
| <i>Scolia (Discolia) clypeata</i>      | NA           |
| <i>Scolia (Discolia) laeviceps</i>     | NA           |
| <i>Scolia (Discolia) nobilis</i>       | NA           |
| <i>Scolia (Discolia) sikkimensis</i>   | NA           |
| <i>Scolia (Discolia) superciliaris</i> | 0-4          |
| <i>Scolia (Discolia) watanabei</i>     | 3.1          |
| <i>Scolia</i> sp.                      | 0.1          |
| <i>Sericocampsomeris flavomaculata</i> | 0.1          |
