# Supplementary material for: Tackling the Taxonomic Challenges in the Family Scoliidae (Insecta, Hymenoptera) Using an Integrative Approach: A Case Study from Southern China
Source: MDPI journal article supplement (doi:10.3390/insects12100892), 2021-10-01
Supplement: s1 [file s1]

Table S3 Interspecific pairwise distance of Scollidae based on COI sequences (%)

| Species                                   | 1 | 2         | 3         | 4         | 5         | 6         | 7         | 8         | 9         | 10        | 11        | 12        | 13        | 14        | 15        | 16        | 17        | 18        | 19        | 20        | 21        | 22        |         |
|-------------------------------------------|---|-----------|-----------|-----------|-----------|-----------|-----------|-----------|-----------|-----------|-----------|-----------|-----------|-----------|-----------|-----------|-----------|-----------|-----------|-----------|-----------|-----------|---------|
| 1 <i>Austroscolia ruficeps</i>            |   | 18.7–18.8 | 9.8–10    | 19.2      | 19–19.2   | 20.3–20.7 | 19.3–19.4 | 18.1      | 17.1      | 7.2–7.4   | 17.4      | 15.3–16.4 | 8.4       | 8.8       | 9.4       | 9.9       | 7.6       | 8.8       | 9.5–9.9   | 7.9–9     | 9.1–9.3   | 19.9–20   |         |
| 2 <i>Carinoscolia vittifrons</i>          |   |           | 10.2–11.2 | 19.1–19.5 | 18.7–19.2 | 20.4–21.2 | 18.9–19.8 | 19.8–20.4 | 17.6–18.1 | 9.3–10    | 18.9–19.5 | 16.4–17.8 | 20.3–21.1 | 10–10.6   | 20.2–20.9 | 20.6–20.9 | 20.2–21.1 | 10.9–11.4 | 10.9–12   | 10.5–11.7 | 9.7–10.6  | 20.4–21.2 |         |
| 3 <i>Liacos erythrosoma</i>               |   |           |           | 20.3–20.4 | 19.2–19.6 | 19.6–20.3 | 18.7–19.1 | 18.4      | 17.4–17.5 | 8.1–8.5   | 17.8–18.1 | 15.1–16.5 | 10.7–11   | 9.7–10    | 10.4–10.5 | 10.1–10.4 | 10–10.2   | 10.3–10.6 | 10.6–11.2 | 9.1–10.6  | 10–10.5   | 11.1–11.5 |         |
| 4 <i>Megacampsomeris asiatica</i>         |   |           |           |           | 9.1–9.5   | 15.3–15.6 | 10.6–10.8 | 10.7      | 9.4       | 9.3–9.4   | 17.4      | 14.9–15.4 | 9.1       | 19.6      | 19.4      | 18.1      | 18.5      | 20.1      | 19.6–20.7 | 19.2–19.4 | 19.3–19.4 | 16.7–16.8 |         |
| 5 <i>Megacampsomeris binghami</i>         |   |           |           |           |           | 14.1–14.3 | 8.9–9.1   | 8.3–8.8   | 9.1–9.7   | 17.9–18   | 16.8–17.1 | 13.4–13.8 | 18.6–18.7 | 18.5–18.7 | 19.5      | 18.9      | 18.6–18.7 | 19.8–19.9 | 18.6–19   | 18.4–19.2 | 18.2–18.6 | 15.5–16.2 |         |
| 6 <i>Megacampsomeris farrenwhitei</i>     |   |           |           |           |           |           | 13–13.5   | 14.7–15   | 22.1–22.7 | 18–18.5   | 17.6–17.9 | 15.5–16.7 | 18.8–19.1 | 19.1–19.3 | 19.3–19.8 | 20.1–20.4 | 19.9–20.4 | 20.3–20.6 | 19.7–20.2 | 20–20.6   | 17.9–19.4 | 19.2–19.7 |         |
| 7 <i>Megacampsomeris prismatica</i>       |   |           |           |           |           |           |           | 9         | 8.1–8.4   | 16.5–16.7 | 16.7–17.1 | 13.2–14.4 | 18–18.1   | 18–18.1   | 18–18.1   | 17.6      | 17.4–17.5 | 17.8–18   | 16.7–18   | 17.1–18.1 | 16.7–16.9 | 16.2–16.4 |         |
| 8 <i>Megacampsomeris pulchrivestita</i>   |   |           |           |           |           |           |           |           | 9         | 17.1–17.4 | 15        | 14.2–15   | 18.9      | 18.6      | 18.4      | 17.7      | 17.4      | 18.9      | 17.8–18.6 | 18.1–18.7 | 18–18.1   | 15.5–15.6 |         |
| 9 <i>Megacampsomeris shillongensis</i>    |   |           |           |           |           |           |           |           |           | 15.3–15.5 | 15.2–15.3 | 13.6–14.2 | 16.4      | 17.4      | 17.9      | 17.7      | 17.3      | 17.9      | 15.9–16.9 | 17.2–17.9 | 16.8–16.9 | 15.8–15.9 |         |
| 10 <i>Megascolia (Regiscolia) azurea</i>  |   |           |           |           |           |           |           |           |           |           | 17.1–17.2 | 13.9–15   | 18.4      | 8.5–8.6   | 9.7–9.8   | 8.7       | 8.1       | 9–9.1     | 8.2–8.5   | 7–8.4     | 8.1–8.3   | 19.8–20   |         |
| 11 <i>Micromeriella marginella</i>        |   |           |           |           |           |           |           |           |           |           |           | 15.5–16.4 | 17.9      | 17.1      | 17.7–17.8 | 18–18.1   | 17.8      | 18.5      | 17.9–18.8 | 17.6–18.4 | 16.7–17.1 | 18.8–18.9 |         |
| 12 <i>Phalerimeris phalerata</i>          |   |           |           |           |           |           |           |           |           |           |           | 14.2–15.3 | 15.2–16.4 | 15.1–16.2 | 15.5–16.4 | 14.8–15.7 | 16–17     | 14.5–16   | 15–16.7   | 13.7–14.8 | 16.5–17.4 |           |         |
| 13 <i>Scolia (Discolia) affinis</i>       |   |           |           |           |           |           |           |           |           |           |           |           |           | 9.1       | 8.5       | 6.9       | 7.9       | 8.5       | 5.9–6.3   | 7.3–7.5   | 5.7–5.9   | 19.5–19.6 |         |
| 14 <i>Scolia (Discolia) binotata</i>      |   |           |           |           |           |           |           |           |           |           |           |           |           |           | 8.2       | 8.9       | 9.2       | 10.1      | 10–10.9   | 7.4–8.8   | 7.8       | 19.6–19.7 |         |
| 15 <i>Scolia (Discolia) clypeata</i>      |   |           |           |           |           |           |           |           |           |           |           |           |           |           |           | 8.5       | 8.3       | 9.7       | 9.5–10    | 9.1–9.8   | 6.9–7.4   | 8.6–8.7   |         |
| 16 <i>Scolia (Discolia) laeviceps</i>     |   |           |           |           |           |           |           |           |           |           |           |           |           |           |           |           |           | 6         | 7.6       | 8.5–8.7   | 7.3–7.8   | 6.2–6.3   | 19.9–20 |
| 17 <i>Scolia (Discolia) nobilis</i>       |   |           |           |           |           |           |           |           |           |           |           |           |           |           |           |           |           |           | 5.3       | 8.3–9.3   | 6.5–7.6   | 6.6–6.7   | 19–19.1 |
| 18 <i>Scolia (Discolia) sikkimensis</i>   |   |           |           |           |           |           |           |           |           |           |           |           |           |           |           |           |           |           | 8.8–9.1   | 7.6–8.5   | 7.2–7.7   | 20.5–20.6 |         |
| 19 <i>Scolia (Discolia) superciliaris</i> |   |           |           |           |           |           |           |           |           |           |           |           |           |           |           |           |           |           |           | 7.8–9.1   | 7.7–8.6   | 20.2–20.8 |         |
| 20 <i>Scolia (Discolia) watanabei</i>     |   |           |           |           |           |           |           |           |           |           |           |           |           |           |           |           |           |           |           |           | 6.2–7.6   | 8.9–9.1   |         |
| 21 <i>Scolia</i> sp.                      |   |           |           |           |           |           |           |           |           |           |           |           |           |           |           |           |           |           |           |           |           | 19.7–19.9 |         |
| 22 <i>Sericocampsomeris flavomaculata</i> |   |           |           |           |           |           |           |           |           |           |           |           |           |           |           |           |           |           |           |           |           |           |         |
